# Supplementary figures and images for: Assessing Systems Properties of Yeast Mitochondria through an Interaction Map of the Organelle
Source: PLOS journal article supplement (doi:10.1371/journal.pgen.0020170), 2006-10-17

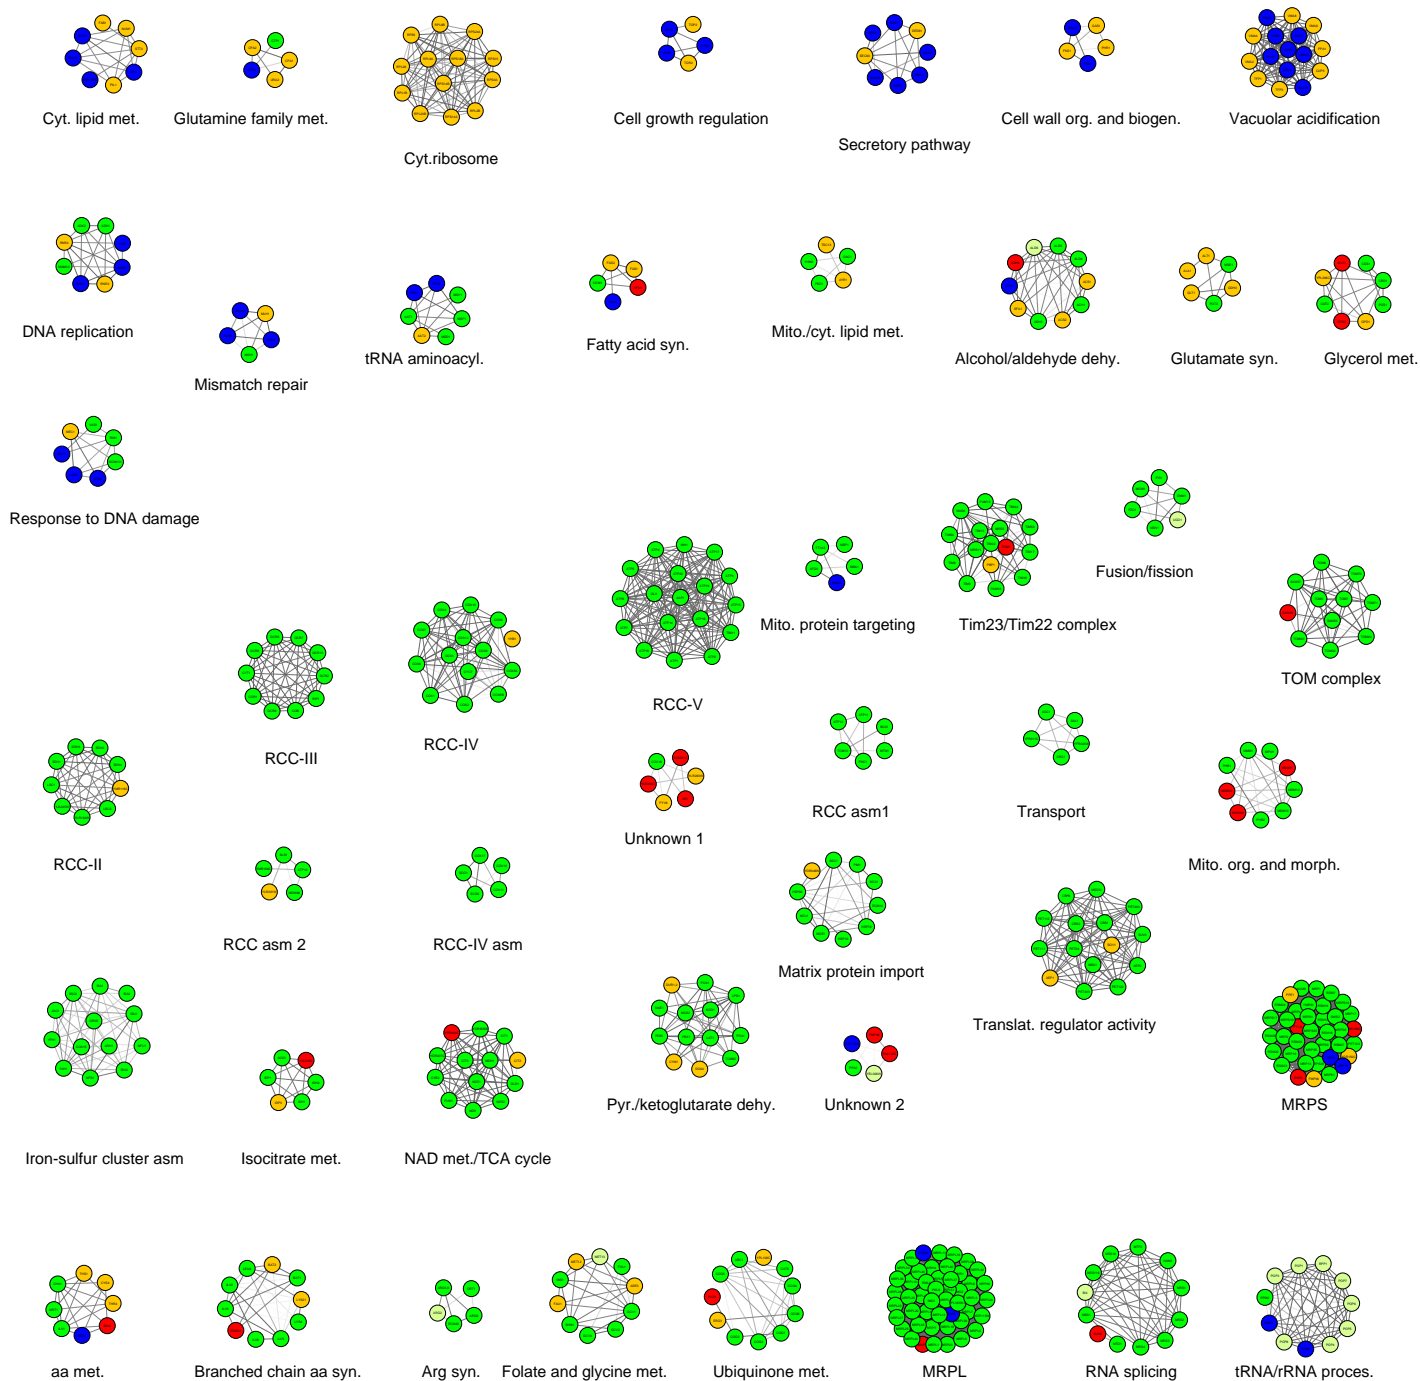

Supplement: S5 (10.1371/journal.pgen.0020170.s005) [file journal.pgen.0020170.s005]
